# Supplementary material for: Genetic Heterogeneity of Susceptibility Gene in Different Ethnic Populations: Refining Association Study of PTPN22 for Graves’ Disease in a Chinese Han Population
Source: PLoS One. 2013 Dec 30;8(12):e84514. doi: 10.1371/journal.pone.0084514 (PMC3875558; doi:10.1371/journal.pone.0084514)
Supplement: Table S2 — Note: SNP: single-nucleotide polymorphism, MAF: minor allele frequency, OR: odds ratio for the minor allele, r2: r square. (XLS) [file pone.0084514.s003.xls]

## Sheet: Sheet3
Table S2. Association results of the 255 imputed and typed SNPs with GD in initial genome-wide scan and the r2 with the 9 tagSNPs.
SNP	Chr. Position	Annotated Gene	Alleles	MAF	P-Value	OR (95% CI)	SnpType	tagSNPs	r2 with the tagSNP
rs10858000	114075796	MAGI3	C<T	0.316	0.01266	1.15 (1.03-1.29)	typed	rs1217223	0.96
rs11102648	114076435	MAGI3	C<A	0.3156	0.009301	1.16 (1.04-1.30)	imputed	rs1217223	0.97
rs11102649	114076546	MAGI3	A<G	0.3153	0.009018	1.16 (1.04-1.30)	imputed	rs1217223	0.97
rs7514649	114079822	MAGI3	A<G	0.1698	0.00891	1.20 (1.05-1.38)	typed	rs7514649	1
rs2153977	114080071	MAGI3	C<T	0.3167	0.0108	1.16 (1.04-1.29)	typed	rs1217223	0.97
rs10858001	114081002	MAGI3	G<C	0.3154	0.009013	1.16 (1.04-1.30)	imputed	rs1217223	0.98
rs17461918	114081444	MAGI3	G<A	0.171	0.009993	1.20 (1.04-1.37)	typed	rs7514649	0.99
rs10858002	114082932	MAGI3	A<G	0.3158	0.008437	1.16 (1.04-1.30)	typed	rs1217223	0.97
rs4456089	114084544	MAGI3	C<T	0.3142	0.009562	1.16 (1.04-1.30)	imputed	rs1217223	0.98
rs17508449	114085145	MAGI3	T<C	0.1677	0.007436	1.21 (1.05-1.39)	imputed	rs7514649	1
rs79381435	114085676	MAGI3	A<G	0.1678	0.007984	1.21 (1.05-1.39)	imputed	rs7514649	1
rs11102651	114086821	MAGI3	T<C	0.3139	0.01094	1.16 (1.04-1.29)	imputed	rs1217223	0.98
rs10745339	114088416	MAGI3	A<G	0.3142	0.009562	1.16 (1.04-1.30)	imputed	rs1217223	0.98
rs17013326	114089316	MAGI3	G<A	0.3142	0.009562	1.16 (1.04-1.30)	imputed	rs1217223	0.98
rs72687973	114093421	MAGI3	T<A	0.3264	0.02342	1.14 (1.02-1.27)	imputed	rs1217223	0.93
rs12037873	114093834	MAGI3	T<A	0.3131	0.01559	1.15 (1.03-1.29)	imputed	rs1217223	0.99
rs11102652	114094286	MAGI3	C<T	0.3133	0.01293	1.15 (1.03-1.29)	imputed	rs1217223	0.99
rs12074958	114095339	MAGI3	A<G	0.3143	0.01243	1.15 (1.03-1.29)	typed	rs1217223	0.98
rs12035317	114096097	MAGI3	T<G	0.3139	0.01246	1.15 (1.03-1.29)	typed	rs1217223	0.98
rs4274063	114096460	MAGI3	A<G	0.3135	0.01209	1.15 (1.03-1.29)	imputed	rs1217223	0.99
rs4839327	114096499	MAGI3	T<C	0.1695	0.006387	1.21 (1.06-1.39)	imputed	rs7514649	0.99
rs11102653	114101115	MAGI3	G<A	0.3125	0.01119	1.16 (1.04-1.29)	imputed	rs1217223	0.99
rs6689879	114101719	MAGI3	T<C	0.3121	0.01278	1.15 (1.03-1.29)	imputed	rs1217223	0.99
rs12043639	114102229	MAGI3	G<A	0.312	0.0124	1.16 (1.03-1.29)	imputed	rs1217223	0.99
rs75926636	114104765	MAGI3	T<C	0.1686	0.004533	1.22 (1.06-1.40)	imputed	rs7514649	0.99
rs7536360	114105476	MAGI3	A<C	0.3123	0.01119	1.16 (1.04-1.29)	imputed	rs1217223	0.99
rs72687980	114106807	MAGI3	C<T	0.3128	0.01043	1.16 (1.04-1.30)	imputed	rs1217223	0.99
rs12077419	114106923	MAGI3	T<A	0.3127	0.01066	1.16 (1.04-1.29)	imputed	rs1217223	0.99
rs1343128	114108252	MAGI3	G<A	0.3134	0.01109	1.16 (1.04-1.29)	imputed	rs1217223	0.99
rs6704188	114108711	MAGI3	G<A	0.313	0.01265	1.15 (1.03-1.29)	imputed	rs1217223	0.99
rs11102654	114109088	MAGI3	G<A	0.3136	0.01072	1.16 (1.04-1.29)	typed	rs1217223	0.99
rs10858005	114109621	MAGI3	G<T	0.3134	0.01109	1.16 (1.04-1.29)	imputed	rs1217223	0.99
rs6699022	114109635	MAGI3	A<T	0.1707	0.006098	1.22 (1.06-1.40)	imputed	rs7514649	0.99
rs79470224	114109785	MAGI3	G<T	0.1688	0.004098	1.23 (1.07-1.41)	imputed	rs7514649	0.99
rs1418958	114110836	MAGI3	A<T	0.3142	0.009776	1.16 (1.04-1.30)	imputed	rs1217223	0.99
rs1418957	114110901	MAGI3	T<A	0.3134	0.01159	1.16 (1.03-1.29)	imputed	rs1217223	0.99
rs1343125	114111036	MAGI3	A<G	0.3128	0.01004	1.16 (1.04-1.30)	imputed	rs1217223	0.99
rs2884704	114114717	MAGI3	T<C	0.3257	0.01235	1.15 (1.03-1.29)	imputed	rs1217223	0.93
rs2884703	114114843	MAGI3	G<A	0.3112	0.01082	1.16 (1.04-1.30)	imputed	rs1217223	0.99
rs75159321	114114947	MAGI3	C<T	0.1668	0.003903	1.23 (1.07-1.41)	imputed	rs7514649	0.99
rs76752412	114115827	MAGI3	A<G	0.1667	0.004197	1.23 (1.07-1.41)	imputed	rs7514649	0.99
rs12039224	114116845	MAGI3	A<G	0.3106	0.01056	1.16 (1.04-1.30)	imputed	rs1217223	0.99
rs12021513	114116889	MAGI3	C<T	0.3106	0.01056	1.16 (1.04-1.30)	imputed	rs1217223	0.99
rs10858007	114119237	MAGI3	A<G	0.3106	0.01002	1.16 (1.04-1.30)	imputed	rs1217223	0.99
rs10858008	114119620	MAGI3	C<T	0.313	0.00975	1.16 (1.04-1.30)	imputed	rs1217223	0.99
rs11102658	114119751	MAGI3	G<C	0.3132	0.009981	1.16 (1.04-1.30)	imputed	rs1217223	0.99
rs1217201	114123773	MAGI3	A<G	0.3092	0.01501	1.15 (1.03-1.29)	imputed	rs1217223	1
rs1217203	114125259	MAGI3	G<A	0.3094	0.01427	1.15 (1.03-1.29)	imputed	rs1217223	1
rs1235687	114126107	MAGI3	T<G	0.3093	0.01501	1.15 (1.03-1.29)	imputed	rs1217223	1
rs1419231	114126218	MAGI3	G<C	0.1658	0.00842	1.21 (1.05-1.39)	imputed	rs7514649	0.98
rs1217204	114126220	MAGI3	C<G	0.3093	0.01501	1.15 (1.03-1.29)	imputed	rs1217223	1
rs1113523	114129474	MAGI3	G<A	0.3094	0.01457	1.15 (1.03-1.29)	imputed	rs1217223	1
rs1217208	114130098	MAGI3	A<G	0.3093	0.01501	1.15 (1.03-1.29)	imputed	rs1217223	1
rs1217237	114131740	MAGI3	G<T	0.3094	0.01501	1.15 (1.03-1.29)	imputed	rs1217223	1
rs1217236	114132712	MAGI3	A<G	0.3094	0.01457	1.15 (1.03-1.29)	imputed	rs1217223	1
rs75419513	114132796	MAGI3	T<A	0.1658	0.008126	1.21 (1.05-1.39)	imputed	rs7514649	0.98
rs1217235	114134977	MAGI3	G<T	0.3096	0.01414	1.15 (1.03-1.29)	imputed	rs1217223	1
rs4838993	114135133	MAGI3	A<G	0.1661	0.009773	1.20 (1.05-1.38)	imputed	rs7514649	0.98
rs1217234	114135346	MAGI3	G<C	0.3096	0.01332	1.15 (1.03-1.29)	imputed	rs1217223	1
rs4839329	114135705	MAGI3	A<G	0.166	0.01045	1.20 (1.04-1.38)	imputed	rs7514649	0.98
rs1217233	114135708	MAGI3	T<G	0.3096	0.01332	1.15 (1.03-1.29)	imputed	rs1217223	1
rs1217232	114136037	MAGI3	T<C	0.3096	0.01332	1.15 (1.03-1.29)	imputed	rs1217223	1
rs4839330	114137582	MAGI3	C<T	0.166	0.01045	1.20 (1.04-1.38)	imputed	rs7514649	0.98
rs75296543	114138286	MAGI3	A<C	0.166	0.01045	1.20 (1.04-1.38)	imputed	rs7514649	0.98
rs1217230	114138534	MAGI3	T<A	0.3094	0.01332	1.16 (1.03-1.29)	imputed	rs1217223	1
rs1217228	114139359	MAGI3	G<T	0.3094	0.01332	1.16 (1.03-1.29)	imputed	rs1217223	1
rs1217227	114139616	MAGI3	T<C	0.3094	0.01332	1.16 (1.03-1.29)	imputed	rs1217223	1
rs1217226	114139922	MAGI3	T<C	0.3094	0.01332	1.16 (1.03-1.29)	imputed	rs1217223	1
rs1217223	114140889	MAGI3	G<A	0.3094	0.01332	1.16 (1.03-1.29)	imputed	rs1217223	1
rs1235688	114141492	MAGI3	T<C	0.3094	0.01332	1.16 (1.03-1.29)	imputed	rs1217223	1
rs1217221	114141775	MAGI3	A<G	0.2988	0.03402	1.14 (1.01-1.27)	imputed	rs1217223	0.99
rs1217215	114146334	MAGI3	A<C	0.3092	0.01336	1.15 (1.03-1.29)	imputed	rs1217223	1
rs1217214	114147381	MAGI3	C<G	0.3093	0.01377	1.15 (1.03-1.29)	imputed	rs1217223	1
rs76308249	114147681	MAGI3	G<A	0.166	0.01045	1.20 (1.04-1.38)	imputed	rs7514649	0.98
rs1237289	114147865	MAGI3	A<G	0.3093	0.01377	1.15 (1.03-1.29)	imputed	rs1217223	1
rs78703286	114148115	MAGI3	G<A	0.1675	0.009667	1.20 (1.05-1.38)	imputed	rs7514649	0.98
rs10858011	114148921	MAGI3	G<A	0.3094	0.01419	1.15 (1.03-1.29)	imputed	rs1217223	1
rs76112502	114149696	MAGI3	C<T	0.166	0.01045	1.20 (1.04-1.38)	imputed	rs7514649	0.98
rs1217211	114149792	MAGI3	T<A	0.3094	0.01377	1.15 (1.03-1.29)	imputed	rs1217223	1
rs80348557	114151116	MAGI3	T<C	0.166	0.01045	1.20 (1.04-1.38)	imputed	rs7514649	0.98
rs4838994	114151606	MAGI3	A<G	0.166	0.01045	1.20 (1.04-1.38)	imputed	rs7514649	0.98
rs17031716	114151847	MAGI3	C<A	0.325	0.02052	1.14 (1.02-1.28)	imputed	rs1217223	0.93
rs1228280	114154652	MAGI3	G<A	0.3093	0.01314	1.16 (1.03-1.29)	imputed	rs1217223	1
rs1217199	114157788	MAGI3	T<C	0.3088	0.01624	1.15 (1.03-1.29)	imputed	rs1217223	1
rs11102661	114160758	MAGI3	G<A	0.3087	0.01762	1.15 (1.03-1.28)	imputed	rs1217223	1
rs1217200	114161116	MAGI3	A<C	0.3085	0.01595	1.15 (1.03-1.29)	imputed	rs1217223	1
rs4839331	114161631	MAGI3	G<A	0.1686	0.009189	1.20 (1.05-1.38)	imputed	rs7514649	0.95
rs4839332	114162191	MAGI3	T<G	0.167	0.01248	1.19 (1.04-1.37)	imputed	rs7514649	0.95
rs1217192	114162194	MAGI3	A<G	0.3082	0.01637	1.15 (1.03-1.29)	imputed	rs1217223	1
rs1217193	114162619	MAGI3	G<C	0.3082	0.01637	1.15 (1.03-1.29)	imputed	rs1217223	1
rs77892281	114163617	MAGI3	T<A	0.167	0.01206	1.20 (1.04-1.37)	imputed	rs7514649	0.95
rs12565589	114164508	MAGI3	G<A	0.3085	0.01521	1.15 (1.03-1.29)	imputed	rs1217223	1
rs6669008	114166561	MAGI3	G<A	0.2569	0.0006933	1.23 (1.09-1.38)	imputed	rs6669008	1
rs2798135	114166835	MAGI3	T<G	0.3084	0.01521	1.15 (1.03-1.29)	imputed	rs1217223	1
rs55912359	114167099	MAGI3	T<C	0.2569	0.0006933	1.23 (1.09-1.38)	imputed	rs6669008	1
rs76617814	114171234	MAGI3	A<G	0.1674	0.009994	1.20 (1.05-1.38)	imputed	rs7514649	0.95
rs2798138	114171796	MAGI3	C<A	0.3088	0.01413	1.15 (1.03-1.29)	imputed	rs1217223	1
rs1217210	114173800	MAGI3	C<G	0.3096	0.01425	1.15 (1.03-1.29)	imputed	rs1217223	1
rs75374178	114181948	MAGI3	T<C	0.1686	0.009543	1.20 (1.05-1.38)	imputed	rs7514649	0.95
rs1777241	114182622	MAGI3	A<G	0.3086	0.01188	1.16 (1.03-1.29)	imputed	rs1217223	1
rs1230663	114182841	MAGI3	G<A	0.3096	0.01343	1.15 (1.03-1.29)	imputed	rs1217223	1
rs2636001	114183574	MAGI3	C<A	0.3023	0.01908	1.15 (1.03-1.29)	imputed	rs1217223	0.99
rs12745499	114183714	MAGI3	A<T	0.3021	0.009048	1.17 (1.04-1.31)	imputed	rs1217223	0.99
rs61819459	114183751	MAGI3	A<T	0.2986	0.02406	1.14 (1.02-1.28)	imputed	rs1217223	0.99
rs61820160	114183779	MAGI3	T<G	0.3094	0.01227	1.16 (1.03-1.29)	imputed	rs1217223	1
rs1230661	114185590	MAGI3	G<A	0.3266	0.02647	1.13 (1.02-1.26)	typed	rs1217223	0.92
rs1891969	114185855	MAGI3	A<C	0.2582	0.0005735	1.23 (1.09-1.39)	imputed	rs6669008	1
rs17359281	114185959	MAGI3	G<A	0.1687	0.009213	1.20 (1.05-1.38)	imputed	rs7514649	0.95
rs2636002	114186964	MAGI3	A<G	0.3092	0.01424	1.15 (1.03-1.29)	imputed	rs1217223	1
rs12144215	114187155	MAGI3	T<G	0.1604	0.01911	1.19 (1.03-1.37)	imputed	rs7514649	0.94
rs1777237	114187371	MAGI3	A<G	0.3096	0.01343	1.15 (1.03-1.29)	imputed	rs1217223	1
rs3761934	114189067	MAGI3	T<G	0.1687	0.009213	1.20 (1.05-1.38)	imputed	rs7514649	0.94
rs41352847	114189880	MAGI3	A<G	0.1687	0.009213	1.20 (1.05-1.38)	imputed	rs7514649	0.94
rs1777238	114191173	MAGI3	T<C	0.3094	0.01365	1.15 (1.03-1.29)	imputed	rs1217223	1
rs79667495	114191329	MAGI3	G<T	0.1688	0.008892	1.20 (1.05-1.38)	imputed	rs7514649	0.94
rs1146180	114194206	MAGI3	C<T	0.3067	0.016	1.15 (1.03-1.29)	imputed	rs1217223	1
rs2146018	114195330	MAGI3	A<C	0.1688	0.007771	1.21 (1.05-1.39)	imputed	rs7514649	0.94
rs1146182	114196883	MAGI3	A<C	0.3093	0.01489	1.15 (1.03-1.29)	imputed	rs1217223	1
rs6678422	114204700	MAGI3	G<A	0.1691	0.006773	1.21 (1.06-1.39)	imputed	rs7514649	0.94
rs76726048	114206699	MAGI3	C<T	0.1689	0.006542	1.21 (1.06-1.39)	imputed	rs7514649	0.94
rs1743605	114207314	MAGI3	T<G	0.3092	0.01403	1.15 (1.03-1.29)	imputed	rs1217223	1
rs77042378	114209101	MAGI3	T<G	0.1689	0.005867	1.22 (1.06-1.40)	imputed	rs7514649	0.94
rs1230671	114210745	MAGI3	A<T	0.309	0.01282	1.16 (1.03-1.29)	imputed	rs1217223	1
rs61820162	114211450	MAGI3	T<C	0.08777	0.05298	1.20 (1.00-1.44)	imputed	rs12753075	0.998
rs1146187	114212571	MAGI3	G<A	0.309	0.01282	1.16 (1.03-1.29)	imputed	rs1217223	1
rs17359378	114216709	MAGI3	T<A	0.1687	0.005663	1.22 (1.06-1.40)	imputed	rs7514649	0.94
rs6704054	114216831	MAGI3	C<T	0.2577	0.0005128	1.23 (1.10-1.39)	imputed	rs6669008	1
rs1230659	114218261	MAGI3	C<T	0.309	0.01332	1.15 (1.03-1.29)	imputed	rs1217223	1
rs1230658	114218451	MAGI3	G<C	0.309	0.01372	1.15 (1.03-1.29)	imputed	rs1217223	1
rs4839333	114219161	MAGI3	T<A	0.1628	0.00888	1.21 (1.05-1.39)	imputed	rs7514649	0.94
rs6537792	114219601	MAGI3	C<G	0.3091	0.01414	1.15 (1.03-1.29)	imputed	rs1217223	1
rs2359170	114221123	MAGI3	C<G	0.3092	0.01372	1.15 (1.03-1.29)	imputed	rs1217223	1
rs11102669	114222325	MAGI3	G<A	0.309	0.01372	1.15 (1.03-1.29)	imputed	rs1217223	1
rs1230656	114222516	MAGI3	A<C	0.3228	0.02427	1.14 (1.02-1.27)	imputed	rs1217223	0.93
rs1230655	114222591	MAGI3	T<A	0.3085	0.01402	1.15 (1.03-1.29)	imputed	rs1217223	1
rs4838997	114225306	MAGI3	A<G	0.3092	0.01372	1.15 (1.03-1.29)	imputed	rs1217223	1
rs74524050	114231207	MAGI3	C<T	0.1652	0.006498	1.22 (1.06-1.40)	imputed	rs7514649	0.94
rs4839335	114233871	MAGI3	A<G	0.3096	0.01127	1.16 (1.04-1.29)	typed	rs1217223	0.99
rs4839336	114234145	MAGI3	T<A	0.169	0.006349	1.21 (1.06-1.39)	imputed	rs7514649	0.94
rs77551704	114235186	MAGI3	C<G	0.169	0.006574	1.21 (1.06-1.39)	imputed	rs7514649	0.94
rs76038270	114238920	MAGI3	G<C	0.1677	0.005721	1.22 (1.06-1.40)	imputed	rs7514649	0.94
rs17359468	114242706	PHTF1	A<G	0.1365	0.01629	1.21 (1.04-1.41)	imputed	rs7514649	0.83
rs75290614	114242872	PHTF1	T<C	0.165	0.005917	1.22 (1.06-1.40)	imputed	rs7514649	0.94
rs78874053	114242873	PHTF1	T<A	0.165	0.005917	1.22 (1.06-1.40)	imputed	rs7514649	0.94
rs1230649	114244177	PHTF1	T<G	0.346	0.002416	1.19 (1.06-1.32)	imputed	rs1230647	1
rs1936398	114246453	PHTF1	T<C	0.3461	0.002417	1.19 (1.06-1.32)	imputed	rs1230647	1
rs6698586	114249382	PHTF1	T<C	0.3466	0.002464	1.19 (1.06-1.32)	imputed	rs1230647	1
rs1230647	114253639	PHTF1	T<C	0.3474	0.002331	1.19 (1.06-1.32)	typed	rs1230647	1
rs2295853	114253892	PHTF1	G<A	0.3465	0.002533	1.19 (1.06-1.32)	imputed	rs1230647	1
rs12760067	114255495	PHTF1	G<A	0.3456	0.002436	1.19 (1.06-1.32)	imputed	rs1230647	0.93
rs75564289	114255664	PHTF1	G<C	0.2069	0.001325	1.24 (1.09-1.40)	imputed	rs3811021	0.97
rs17031795	114255828	PHTF1	C<T	0.2069	0.001386	1.23 (1.09-1.40)	imputed	rs3811021	0.97
rs1230646	114258882	PHTF1	G<T	0.3604	0.006686	1.17 (1.05-1.30)	imputed	rs1230647	1
rs1230645	114259069	PHTF1	T<C	0.346	0.002394	1.19 (1.06-1.32)	imputed	rs1230647	1
rs4600045	114259557	PHTF1	C<T	0.3461	0.002531	1.19 (1.06-1.32)	imputed	rs1230647	1
rs4589108	114259625	PHTF1	A<T	0.2069	0.001386	1.23 (1.09-1.40)	imputed	rs3811021	0.97
rs2636013	114262556	PHTF1	C<G	0.3457	0.002734	1.19 (1.06-1.32)	imputed	rs1230647	1
rs2636014	114262561	PHTF1	C<T	0.3457	0.002734	1.19 (1.06-1.32)	imputed	rs1230647	1
rs2093436	114263735	PHTF1	A<G	0.3458	0.002735	1.18 (1.06-1.32)	imputed	rs1230647	0.99
rs6663679	114264625	PHTF1	C<T	0.3459	0.002661	1.19 (1.06-1.32)	imputed	rs1230647	0.99
rs4423005	114265244	PHTF1	T<C	0.346	0.002824	1.18 (1.06-1.32)	imputed	rs1230647	0.99
rs1230642	114265491	PHTF1	A<G	0.3599	0.007396	1.16 (1.04-1.30)	imputed	rs1230647	0.93
rs7553188	114265928	PHTF1	T<C	0.346	0.002824	1.18 (1.06-1.32)	imputed	rs1230647	0.99
rs1230640	114267347	PHTF1	T<C	0.3458	0.002672	1.19 (1.06-1.32)	imputed	rs1230647	0.99
rs1981319	114267645	PHTF1	A<C	0.346	0.002747	1.18 (1.06-1.32)	imputed	rs1230647	0.99
rs78552134	114269666	PHTF1	G<A	0.2057	0.001054	1.24 (1.09-1.41)	imputed	rs3811021	0.97
rs1230639	114270907	PHTF1	G<A	0.3458	0.002672	1.19 (1.06-1.32)	imputed	rs1230647	0.99
rs1230638	114271128	PHTF1	G<A	0.3458	0.002672	1.19 (1.06-1.32)	imputed	rs1230647	0.99
rs4839341	114271662	PHTF1	T<C	0.2064	0.001003	1.24 (1.09-1.41)	imputed	rs3811021	0.97
rs12061482	114275437	PHTF1	C<T	0.346	0.002836	1.18 (1.06-1.32)	imputed	rs1230647	0.99
rs78483697	114276709	PHTF1	T<C	0.1732	0.007367	1.21 (1.05-1.39)	imputed	rs3811021	0.87
rs12063216	114277330	PHTF1	G<A	0.3464	0.002756	1.19 (1.06-1.32)	imputed	rs1230647	0.99
rs4839000	114280135	PHTF1	T<G	0.2066	0.001176	1.24 (1.09-1.41)	imputed	rs3811021	0.98
rs78394484	114282758	PHTF1	C<T	0.2065	0.00118	1.24 (1.09-1.41)	imputed	rs3811021	0.98
rs74610368	114285303	PHTF1	A<G	0.205	0.0005596	1.26 (1.11-1.43)	imputed	rs3811021	0.98
rs10858017	114287902	PHTF1	A<G	0.3462	0.00266	1.19 (1.06-1.32)	imputed	rs1230647	0.99
rs4565712	114288280	PHTF1	T<G	0.3462	0.00266	1.19 (1.06-1.32)	imputed	rs1230647	0.99
rs79198040	114288691	PHTF1	G<A	0.2064	0.001127	1.24 (1.09-1.41)	imputed	rs3811021	0.98
rs1230687	114290959	PHTF1	T<A	0.3464	0.002562	1.19 (1.06-1.32)	imputed	rs1230647	0.99
rs1230685	114292544	PHTF1	T<C	0.3462	0.002734	1.18 (1.06-1.32)	imputed	rs1230647	0.99
rs74533448	114292888	PHTF1	T<C	0.2051	0.0005737	1.26 (1.10-1.43)	imputed	rs3811021	0.98
rs1230683	114293247	PHTF1	G<A	0.345	0.002172	1.19 (1.07-1.33)	imputed	rs1230647	0.99
rs1230679	114297775	PHTF1	T<A	0.343	0.00132	1.20 (1.08-1.34)	imputed	rs1230647	0.99
rs1230678	114298420	PHTF1	T<G	0.343	0.00132	1.20 (1.08-1.34)	imputed	rs1230647	0.99
rs2359167	114299516	PHTF1	G<A	0.3581	0.003486	1.18 (1.06-1.32)	imputed	rs1230647	0.93
rs75746385	114300892	PHTF1	G<A	0.2049	0.0006345	1.25 (1.10-1.43)	imputed	rs3811021	0.98
rs61817589	114301335	PHTF1	C<T	0.36	0.0065	1.17 (1.05-1.30)	imputed	rs1230647	0.93
rs2797412	114302966	PHTF1	C<T	0.3446	0.001458	1.20 (1.07-1.34)	imputed	rs1230647	0.99
rs10858018	114311768	RSBN1	G<A	0.3446	0.001415	1.20 (1.07-1.34)	imputed	rs1230647	0.99
rs4145859	114312435	RSBN1	G<C	0.3581	0.003486	1.18 (1.06-1.32)	imputed	rs1230647	0.93
rs12041547	114316220	RSBN1	G<C	0.3616	0.006597	1.17 (1.05-1.30)	imputed	rs1230647	0.93
rs1935838	114317791	RSBN1	C<T	0.3507	0.001432	1.20 (1.07-1.34)	imputed	rs1230647	0.99
rs10858019	114319233	RSBN1	A<C	0.3483	0.002609	1.19 (1.06-1.32)	imputed	rs1230647	0.99
rs12044534	114319416	RSBN1	G<C	0.348	0.002403	1.19 (1.07-1.32)	imputed	rs1230647	0.99
rs78491726	114327469	RSBN1	C<T	0.2072	0.001197	1.24 (1.09-1.40)	imputed	rs3811021	0.99
rs1217396	114338236	RSBN1	T<C	0.3464	0.00365	1.18 (1.06-1.31)	imputed	rs1230647	0.97
rs1217380	114343336	RSBN1	A<G	0.3464	0.00365	1.18 (1.06-1.31)	imputed	rs1230647	0.97
rs79100402	114346160	RSBN1	G<A	0.2068	0.001354	1.23 (1.09-1.40)	imputed	rs3811021	0.99
rs3195954	114354654	RSBN1	C<T	0.2068	0.001354	1.23 (1.09-1.40)	imputed	rs3811021	0.99
rs55940960	114356096	RSBN1	T<C	0.2068	0.001354	1.23 (1.09-1.40)	imputed	rs3811021	0.99
rs1217412	114357211	PTPN22	A<G	0.3442	0.003831	1.18 (1.06-1.31)	imputed	rs1230647	0.97
rs9429730	114360067	PTPN22	G<T	0.3454	0.003418	1.18 (1.06-1.31)	imputed	rs1230647	0.97
rs1217388	114364476	PTPN22	A<G	0.3443	0.003936	1.18 (1.06-1.31)	imputed	rs1230647	0.97
rs55951516	114365513	PTPN22	A<G	0.2074	0.001339	1.23 (1.09-1.40)	imputed	rs3811021	0.99
rs1217389	114365752	PTPN22	T<C	0.3464	0.003554	1.18 (1.06-1.31)	imputed	rs1230647	0.97
rs79684724	114366746	PTPN22	T<C	0.2075	0.001632	1.23 (1.08-1.40)	imputed	rs3811021	0.99
rs10858021	114368777	PTPN22	T<G	0.345	0.007278	1.16 (1.04-1.30)	imputed	rs1230647	0.97
rs17463292	114371240	PTPN22	C<T	0.2077	0.001783	1.23 (1.08-1.39)	imputed	rs3811021	0.99
rs3761935	114372528	PTPN22	G<T	0.2077	0.001783	1.23 (1.08-1.39)	imputed	rs3811021	0.99
rs1217395	114374435	PTPN22	T<C	0.3465	0.003868	1.18 (1.06-1.31)	imputed	rs1230647	0.97
rs1599971	114377093	PTPN22	G<A	0.3464	0.003766	1.18 (1.06-1.31)	imputed	rs1230647	0.97
rs17509844	114377769	PTPN22	A<G	0.2083	0.001503	1.23 (1.08-1.40)	imputed	rs3811021	0.99
rs1746853	114383097	PTPN22	C<A	0.2521	0.01487	1.16 (1.03-1.31)	imputed	rs1746853	1
rs1217386	114383637	PTPN22	G<A	0.3465	0.003667	1.18 (1.06-1.31)	imputed	rs1230647	0.97
rs6658523	114386059	PTPN22	A<G	0.2085	0.001429	1.23 (1.09-1.40)	imputed	rs3811021	0.99
rs1217407	114393748	PTPN22	G<A	0.3471	0.004654	1.17 (1.05-1.31)	typed	rs1230647	0.97
rs3765598	114394463	PTPN22	T<C	0.2088	0.001452	1.23 (1.08-1.40)	imputed	rs3811021	0.99
rs4839346	114395629	PTPN22	T<C	0.209	0.001588	1.23 (1.08-1.40)	imputed	rs3811021	0.99
rs1217410	114396816	PTPN22	T<C	0.3463	0.004039	1.18 (1.06-1.31)	imputed	rs1230647	0.97
rs3789608	114397788	PTPN22	T<C	0.209	0.001588	1.23 (1.08-1.40)	imputed	rs3811021	0.99
rs34122108	114398112	PTPN22	T<C	0.209	0.001661	1.23 (1.08-1.40)	imputed	rs3811021	0.99
rs55646484	114398774	PTPN22	A<C	0.209	0.001661	1.23 (1.08-1.40)	imputed	rs3811021	0.99
rs35173468	114398821	PTPN22	C<G	0.209	0.001661	1.23 (1.08-1.40)	imputed	rs3811021	0.99
rs11582409	114399433	PTPN22	T<C	0.2091	0.001773	1.23 (1.08-1.39)	imputed	rs3811021	0.99
rs1217416	114400804	PTPN22	T<C	0.3616	0.007645	1.16 (1.04-1.29)	imputed	rs1230647	0.91
rs1217421	114402846	PTPN22	C<G	0.3462	0.00438	1.17 (1.05-1.31)	imputed	rs1230647	0.97
rs1775754	114404901	PTPN22	T<C	0.3439	0.01308	1.15 (1.03-1.28)	imputed	rs1230647	0.97
rs2243471	114406002	PTPN22	A<G	0.36	0.01939	1.14 (1.02-1.27)	imputed	rs1230647	0.91
rs2488458	114406451	PTPN22	C<T	0.3434	0.01882	1.14 (1.02-1.28)	imputed	rs1230647	0.97
rs75511728	114412109	PTPN22	T<C	0.1916	0.01452	1.18 (1.03-1.35)	imputed	rs3811021	0.91
rs17510162	114413731	PTPN22	A<C	0.1914	0.01233	1.19 (1.04-1.36)	imputed	rs3811021	0.91
rs11584821	114419489	BCL2L15	T<C	0.1832	0.004593	1.22 (1.06-1.39)	imputed	rs3811021	0.8
rs12566340	114420328	BCL2L15	C<T	0.3387	0.01781	1.14 (1.03-1.27)	typed	rs1230647	0.82
rs7529353	114420462	BCL2L15	G<A	0.3392	0.01908	1.14 (1.02-1.27)	typed	rs1230647	0.82
rs11102691	114421313	BCL2L15	C<T	0.3399	0.00879	1.16 (1.04-1.30)	imputed	rs1230647	0.82
rs2358994	114429461	BCL2L15	G<A	0.3438	0.04315	1.12 (1.01-1.25)	typed	rs2358994	1
rs2358995	114429515	BCL2L15	A<C	0.3444	0.045	1.12 (1.01-1.25)	imputed	rs2358994	0.99
rs7547478	114431463	BCL2L15	G<A	0.3453	0.03289	1.13 (1.01-1.26)	imputed	rs2358994	0.99
rs17464525	114443899	AP4B1	A<G	0.1674	0.007319	1.21 (1.05-1.39)	typed	rs17464525	1
Note: SNP: single-nucleotide polymorphism, MAF: minor allele frequency, OR: odds ratio for the minor allele, r2: r square.
